# Supplementary material
Source: MDPI journal article supplement (https://www.mdpi.com/2075-163X/8/6/260)
Supplement: s1 [file s1]

# Supplementary Materials: Three–D Mineralogical Mapping of the Kovdor Phoscorite–Carbonatite Complex, NW Russia: I. Forsterite

Julia A. Mikhailova, Gregory Yu. Ivanyuk, Andrey O. Kalashnikov, Yakov A. Pakhomovsky, Ayya V. Bazai, Taras L. Panikorovskii, Victor N. Yakovenchuk, Nataly G. Konopleva and Pavel M. Goryainov

## 1. X-Ray Supplementary Data for Forsterite\_1

**Table S1.** Fractional atomic coordinates ( $\times 10^4$ ) and equivalent isotropic displacement parameters ( $\text{\AA}^2 \times 10^3$ ) for Forsterite\_1.  $U_{eq}$  is defined as 1/3 of the trace of the orthogonalised  $U_{ij}$  tensor.

| Atom | <i>x</i>   | <i>y</i> | <i>z</i>  | $U_{eq}$ |
|------|------------|----------|-----------|----------|
| Si1  | 4058.7(9)  | 7500     | 739.6(19) | 3.2(3)   |
| M2   | 2225.8(10) | 7500     | 5100(2)   | 2.0(4)   |
| Fe2  | 2225.8(10) | 7500     | 5100(2)   | 2.0(4)   |
| M1   | 5000       | 5000     | 5000      | 1.6(4)   |
| Fe1  | 5000       | 5000     | 5000      | 1.6(4)   |
| O1   | 4088(2)    | 7500     | −2661(5)  | 3.7(5)   |
| O2   | 3370.1(15) | 5338(3)  | 2227(3)   | 4.3(4)   |
| O3   | 5527(2)    | 7500     | 2212(5)   | 4.8(5)   |

**Table S2.** Anisotropic displacement parameters ( $\text{\AA}^2 \times 10^3$ ) for Forsterite\_1. The anisotropic displacement factor exponent takes the form:  $-2\pi^2[h^2a^2 \times U_{11} + 2hka \times b \times U_{12} + \dots]$ .

| Atom | $U_{11}$ | $U_{22}$ | $U_{33}$ | $U_{23}$ | $U_{13}$ | $U_{12}$ |
|------|----------|----------|----------|----------|----------|----------|
| Si1  | 4.2(5)   | 3.1(5)   | 2.4(5)   | 0        | −0.2(3)  | 0        |
| M2   | 2.7(6)   | 1.2(6)   | 2.1(6)   | 0        | −0.5(4)  | 0        |
| Fe2  | 2.7(6)   | 1.2(6)   | 2.1(6)   | 0        | −0.5(4)  | 0        |
| M1   | 3.0(6)   | 1.2(7)   | 0.7(6)   | 0.6(4)   | 0.6(4)   | 0.2(4)   |
| Fe1  | 3.0(6)   | 1.2(7)   | 0.7(6)   | 0.6(4)   | 0.6(4)   | 0.2(4)   |
| O1   | 5.9(10)  | 2.5(11)  | 2.7(10)  | 0        | −0.1(8)  | 0        |
| O2   | 4.9(8)   | 4.1(8)   | 4.0(8)   | −0.2(7)  | 0.6(6)   | 0.0(7)   |
| O3   | 5.5(11)  | 4.0(11)  | 5.0(11)  | 0        | 0.5(9)   | 0        |

**Table S3.** Bond lengths for Forsterite\_1.

| Atom | Atom             | Length/ $\text{\AA}$ |
|------|------------------|----------------------|
| Si1  | O1               | 1.612(3)             |
| Si1  | O2               | 1.6301(16)           |
| Si1  | O2 <sup>4</sup>  | 1.6301(16)           |
| Si1  | O3               | 1.651(2)             |
| M2   | O1 <sup>6</sup>  | 2.174(3)             |
| M2   | O2 <sup>7</sup>  | 2.0635(17)           |
| M2   | O2               | 2.2097(18)           |
| M2   | O2 <sup>8</sup>  | 2.0635(17)           |
| M2   | O2 <sup>4</sup>  | 2.2097(18)           |
| M2   | O3 <sup>5</sup>  | 2.049(2)             |
| M1   | O1 <sup>11</sup> | 2.0792(17)           |
| M1   | O1 <sup>6</sup>  | 2.0792(17)           |
| M1   | O2               | 2.1278(16)           |

|    |                 |            |
|----|-----------------|------------|
| M1 | O2 <sup>9</sup> | 2.1278(16) |
| M1 | O3 <sup>9</sup> | 2.0650(16) |
| M1 | O3              | 2.0650(16) |

<sup>1</sup>1 - X, 1/2 + Y, -Z; <sup>2</sup>1 - X, 1/2 + Y, 1 - Z; <sup>3</sup>+X, +Y, -1 + Z; <sup>4</sup>+X, 3/2 - Y, +Z; <sup>5</sup>-1/2 + X, +Y, 1/2 - Z; <sup>6</sup>+X, +Y, 1 + Z; <sup>7</sup>1/2 - X, 1/2 + Y, 1/2 + Z; <sup>8</sup>1/2 - X, 1 - Y, 1/2 + Z; <sup>9</sup>1 - X, 1 - Y, 1 - Z; <sup>10</sup>1 - X, -1/2 + Y, 1 - Z; <sup>11</sup>1 - X, 1 - Y, -Z; <sup>12</sup>1/2 - X, 1 - Y, -1/2 + Z; <sup>13</sup>1/2 + X, +Y, 1/2 - Z.

**Table S4.** Atomic occupancy for Forsterite\_1.

| Atom | Occupancy |
|------|-----------|
| M2   | 0.965(5)  |
| Fe1  | 0.020(4)  |
| Fe2  | 0.035(5)  |
| M1   | 0.980(4)  |

## 2. X-Ray Supplementary Data for Forsterite\_2

**Table S5.** Fractional atomic coordinates ( $\times 10^4$ ) and equivalent isotropic displacement parameters ( $\text{\AA}^2 \times 10^3$ ) for Forsterite\_2.  $U_{eq}$  is defined as 1/3 of the trace of the orthogonalised  $U_{ij}$  tensor.

| Atom | x          | y       | z          | $U_{eq}$ |
|------|------------|---------|------------|----------|
| Si1  | 4058.6(8)  | 7500    | 733.7(17)  | 3.9(3)   |
| M2   | 2226.2(9)  | 7500    | 5102.3(17) | 2.7(3)   |
| Fe2  | 2226.2(9)  | 7500    | 5102.3(17) | 2.7(3)   |
| M1   | 5000       | 5000    | 5000       | 2.7(3)   |
| Mg1  | 5000       | 5000    | 5000       | 2.7(3)   |
| O1   | 4087(2)    | 7500    | -2661(4)   | 5.4(5)   |
| O2   | 3368.5(14) | 5335(2) | 2223(3)    | 5.3(4)   |
| O3   | 5526(2)    | 7500    | 2212(4)    | 5.0(4)   |

**Table S6.** Anisotropic displacement parameters ( $\text{\AA}^2 \times 10^3$ ) for Forsterite\_2. The anisotropic displacement factor exponent takes the form:  $-2\pi^2[h^2a^2 \times U_{11} + 2hka \times b \times U_{12} + \dots]$ .

| Atom | $U_{11}$ | $U_{22}$ | $U_{33}$ | $U_{23}$ | $U_{13}$ | $U_{12}$ |
|------|----------|----------|----------|----------|----------|----------|
| Si1  | 5.9(4)   | 4.4(4)   | 1.4(4)   | 0        | 0.1(3)   | 0        |
| M2   | 4.7(4)   | 3.0(4)   | 0.4(4)   | 0        | 0.1(2)   | 0        |
| Fe2  | 4.7(4)   | 3.0(4)   | 0.4(4)   | 0        | 0.1(2)   | 0        |
| M1   | 4.7(4)   | 3.0(4)   | 0.4(4)   | 0        | 0.1(2)   | 0        |
| Mg1  | 4.7(4)   | 3.0(4)   | 0.4(4)   | 0        | 0.1(2)   | 0        |
| O1   | 7.7(10)  | 7.6(10)  | 0.8(9)   | 0        | 0.2(7)   | 0        |
| O2   | 8.1(7)   | 6.1(7)   | 1.8(7)   | 0.4(5)   | 0.0(5)   | 0.3(6)   |
| O3   | 6.7(10)  | 5.7(10)  | 2.6(9)   | 0        | 0.3(8)   | 0        |

**Table S7.** Bond lengths for Forsterite\_2.

| Atom | Atom            | Length/ $\text{\AA}$ |
|------|-----------------|----------------------|
| Si1  | O1              | 1.617(2)             |
| Si1  | O2 <sup>4</sup> | 1.6379(15)           |
| Si1  | O2              | 1.6379(15)           |
| Si1  | O3              | 1.656(2)             |
| M2   | O1 <sup>6</sup> | 2.179(2)             |
| M2   | O2 <sup>4</sup> | 2.2192(16)           |
| M2   | O2              | 2.2191(16)           |
| M2   | O2 <sup>7</sup> | 2.0671(15)           |

|    |                  |            |
|----|------------------|------------|
| M2 | O2 <sup>8</sup>  | 2.0671(15) |
| M2 | O3 <sup>5</sup>  | 2.058(2)   |
| M1 | O1 <sup>6</sup>  | 2.0867(15) |
| M1 | O1 <sup>11</sup> | 2.0867(15) |
| M1 | O2               | 2.1371(14) |
| M1 | O2 <sup>9</sup>  | 2.1371(14) |
| M1 | O3               | 2.0721(14) |
| M1 | O3 <sup>9</sup>  | 2.0721(14) |

<sup>1</sup>1 - X, 1/2 + Y, 1 - Z; <sup>2</sup>4X, +Y, -1 + Z; <sup>3</sup>1 - X, 1/2 + Y, -Z; <sup>4</sup>4X, 3/2 - Y, +Z; <sup>5</sup>-1/2 + X, +Y, 1/2 - Z; <sup>6</sup>4X, +Y, 1 + Z; <sup>7</sup>1/2 - X, 1/2 + Y, 1/2 + Z; <sup>8</sup>1/2 - X, 1 - Y, 1/2 + Z; <sup>9</sup>1 - X, 1 - Y, 1 - Z; <sup>10</sup>1 - X, -1/2 + Y, 1 - Z; <sup>11</sup>1 - X, 1 - Y, -Z; <sup>12</sup>1/2 - X, 1 - Y, -1/2 + Z; <sup>13</sup>1/2 + X, +Y, 1/2 - Z.

**Table S8.** Atomic occupancy for Forsterite\_2.

| Atom | Occupancy |
|------|-----------|
| M2   | 0.932(4)  |
| Mg1  | 0.941(3)  |
| Fe2  | 0.068(4)  |
| M1   | 0.059(3)  |

**3. X-Ray Supplementary Data for Forsterite\_3****Table S9.** Fractional atomic coordinates ( $\times 10^4$ ) and equivalent isotropic displacement parameters ( $\text{\AA}^2 \times 10^3$ ) for Forsterite\_3.  $U_{eq}$  is defined as 1/3 of the trace of the orthogonalised  $U_{ij}$  tensor.

| Atom | x          | y       | z        | $U_{eq}$ |
|------|------------|---------|----------|----------|
| Si1  | 4058.3(10) | 7500    | 733(2)   | 3.8(3)   |
| M2   | 2223.9(10) | 7500    | 5104(2)  | 2.7(4)   |
| Fe2  | 2223.9(10) | 7500    | 5104(2)  | 2.7(4)   |
| M1   | 5000       | 5000    | 5000     | 3.1(4)   |
| Mg1  | 5000       | 5000    | 5000     | 3.1(4)   |
| O1   | 4085(2)    | 7500    | -2664(5) | 3.6(6)   |
| O2   | 3369.0(16) | 5335(3) | 2218(4)  | 5.0(4)   |
| O3   | 5523(2)    | 7500    | 2207(5)  | 3.9(6)   |

**Table S10.** Anisotropic displacement parameters ( $\text{\AA}^2 \times 10^3$ ) for Forsterite\_3. The Anisotropic displacement factor exponent takes the form:  $-2\pi^2[h^2a^2 + 2hka \times b \times U_{12} + \dots]$ .

| Atom | $U_{11}$ | $U_{22}$ | $U_{33}$ | $U_{23}$ | $U_{13}$ | $U_{12}$ |
|------|----------|----------|----------|----------|----------|----------|
| Si1  | 3.3(5)   | 4.5(5)   | 3.6(6)   | 0        | 0.1(4)   | 0        |
| M2   | 2.3(5)   | 2.8(6)   | 2.9(7)   | 0        | -0.1(4)  | 0        |
| Fe2  | 2.3(5)   | 2.8(6)   | 2.9(7)   | 0        | -0.1(4)  | 0        |
| M1   | 3.5(5)   | 3.0(6)   | 2.9(7)   | 0.1(4)   | 0.6(4)   | 0.3(4)   |
| Mg1  | 3.5(5)   | 3.0(6)   | 2.9(7)   | 0.1(4)   | 0.6(4)   | 0.3(4)   |
| O1   | 4.7(11)  | 4.0(11)  | 2.1(14)  | 0        | -0.6(10) | 0        |
| O2   | 6.2(8)   | 4.9(8)   | 3.9(10)  | 0.1(7)   | 0.1(7)   | -0.4(7)  |
| O3   | 3.7(11)  | 3.9(12)  | 4.1(14)  | 0        | 0.8(10)  | 0        |

**Table S11.** Bond lengths for Forsterite\_3.

| Atom | Atom            | Length/ $\text{\AA}$ |
|------|-----------------|----------------------|
| Si1  | O1              | 1.617(3)             |
| Si1  | O2 <sup>4</sup> | 1.6359(17)           |
| Si1  | O2              | 1.6359(17)           |

|     |                  |            |
|-----|------------------|------------|
| Si1 | O3               | 1.652(3)   |
| M2  | O1 <sup>6</sup>  | 2.177(3)   |
| M2  | O2 <sup>7</sup>  | 2.0639(17) |
| M2  | O2 <sup>4</sup>  | 2.2214(19) |
| M2  | O2               | 2.2215(19) |
| M2  | O2 <sup>8</sup>  | 2.0639(17) |
| M2  | O3 <sup>5</sup>  | 2.056(3)   |
| M1  | O1 <sup>6</sup>  | 2.0855(17) |
| M1  | O1 <sup>11</sup> | 2.0855(17) |
| M1  | O2 <sup>9</sup>  | 2.1369(17) |
| M1  | O2               | 2.1369(17) |
| M1  | O3 <sup>9</sup>  | 2.0721(17) |
| M1  | O3               | 2.0721(17) |

<sup>1</sup>1/2 + X, +Y, 1/2 - Z; <sup>2</sup>1 - X, 1/2 + Y, 1 - Z; <sup>3</sup>+X, +Y, -1 + Z; <sup>4</sup>+X, 3/2 - Y, +Z; <sup>5</sup>-1/2 + X, +Y, 1/2 - Z; <sup>6</sup>+X, +Y, 1 + Z; <sup>7</sup>1/2 - X, 1/2 + Y, 1/2 + Z; <sup>8</sup>1/2 - X, 1 - Y, 1/2 + Z; <sup>9</sup>1 - X, 1 - Y, 1 - Z; <sup>10</sup>1 - X, -1/2 + Y, 1 - Z; <sup>11</sup>1 - X, 1 - Y, -Z; <sup>12</sup>1 - X, 1/2 + Y, -Z; <sup>13</sup>1/2 - X, 1 - Y, -1/2 + Z.

**Table S12.** Atomic occupancy for Forsterite\_3.

| Atom | Occupancy |
|------|-----------|
| M2   | 0.916(4)  |
| Mg1  | 0.920(4)  |
| Fe2  | 0.084(4)  |
| M1   | 0.080(4)  |

#### 4. X-Ray Supplementary Data for Forsterite\_4

**Table S13.** Fractional atomic coordinates ( $\times 10^4$ ) and equivalent isotropic displacement parameters ( $\text{\AA}^2 \times 10^3$ ) for Forsterite\_4.  $U_{eq}$  is defined as 1/3 of the trace of the orthogonalised  $U_{ij}$  tensor.

| Atom | x          | y       | z          | $U_{eq}$ |
|------|------------|---------|------------|----------|
| Si1  | 4056.9(8)  | 7500    | 736.7(17)  | 3.6(2)   |
| M2   | 2226.4(9)  | 7500    | 5101.5(19) | 2.1(3)   |
| Fe2  | 2226.4(9)  | 7500    | 5101.5(19) | 2.1(3)   |
| M1   | 5000       | 5000    | 5000       | 2.2(3)   |
| Fe1  | 5000       | 5000    | 5000       | 2.2(3)   |
| O1   | 4086(2)    | 7500    | -2660(4)   | 4.7(5)   |
| O2   | 3368.9(13) | 5334(2) | 2225(3)    | 4.5(3)   |
| O3   | 5523.9(19) | 7500    | 2213(4)    | 5.0(5)   |

**Table S14.** Anisotropic displacement parameters ( $\text{\AA}^2 \times 10^3$ ) for Forsterite\_4. The anisotropic displacement factor exponent takes the form:  $-2\pi^2[h^2a \times {}^2U_{11} + 2hka \times b \times U_{12} + \dots]$ .

| Atom | $U_{11}$ | $U_{22}$ | $U_{33}$ | $U_{23}$ | $U_{13}$ | $U_{12}$ |
|------|----------|----------|----------|----------|----------|----------|
| Si1  | 3.5(4)   | 3.4(4)   | 3.8(4)   | 0        | -0.1(3)  | 0        |
| M2   | 1.3(5)   | 1.8(5)   | 3.1(5)   | 0        | -0.1(3)  | 0        |
| Fe2  | 1.3(5)   | 1.8(5)   | 3.1(5)   | 0        | -0.1(3)  | 0        |
| M1   | 3.1(5)   | 1.3(5)   | 2.2(5)   | 0.1(3)   | 0.1(4)   | 0.9(4)   |
| Fe1  | 3.1(5)   | 1.3(5)   | 2.2(5)   | 0.1(3)   | 0.1(4)   | 0.9(4)   |
| O1   | 5.1(9)   | 6(1)     | 3(1)     | 0        | -0.1(8)  | 0        |
| O2   | 5.2(6)   | 5.3(7)   | 3.0(7)   | 0.0(6)   | 0.6(6)   | 0.5(6)   |
| O3   | 5.1(9)   | 5(1)     | 4.8(9)   | 0        | 0.2(9)   | 0        |

**Table S15.** Bond lengths for Forsterite\_4.

| Atom | Atom             | Length/Å   |
|------|------------------|------------|
| Si1  | O1               | 1.615(2)   |
| Si1  | O2 <sup>4</sup>  | 1.6339(15) |
| Si1  | O2               | 1.6339(15) |
| Si1  | O3               | 1.653(2)   |
| M2   | O1 <sup>6</sup>  | 2.175(2)   |
| M2   | O2 <sup>7</sup>  | 2.0635(15) |
| M2   | O2 <sup>4</sup>  | 2.2147(16) |
| M2   | O2 <sup>8</sup>  | 2.0635(15) |
| M2   | O2               | 2.2147(16) |
| M2   | O3 <sup>5</sup>  | 2.056(2)   |
| M1   | O1 <sup>11</sup> | 2.0836(15) |
| M1   | O1 <sup>6</sup>  | 2.0836(15) |
| M1   | O2               | 2.1330(14) |
| M1   | O2 <sup>9</sup>  | 2.1330(14) |
| M1   | O3               | 2.0676(14) |
| M1   | O3 <sup>9</sup>  | 2.0676(14) |

<sup>11</sup>1 - X, 1/2 + Y, -Z; <sup>21</sup>1 - X, 1/2 + Y, 1 - Z; <sup>3+</sup>X, +Y, -1 + Z; <sup>4+</sup>X, 3/2 - Y, +Z; <sup>5-</sup>1/2 + X, +Y, 1/2 - Z; <sup>6+</sup>X, +Y, 1 + Z; <sup>7</sup>1/2 - X, 1/2 + Y, 1/2 + Z; <sup>8</sup>1/2 - X, 1 - Y, 1/2 + Z; <sup>9</sup>1 - X, 1 - Y, 1 - Z; <sup>10</sup>1 - X, -1/2 + Y, 1 - Z; <sup>11</sup>1 - X, 1 - Y, -Z; <sup>12</sup>1/2 - X, 1 - Y, -1/2 + Z; <sup>13</sup>1/2 + X, +Y, 1/2 - Z.

**Table S16.** Atomic occupancy for Forsterite\_4.

| Atom | Occupancy |
|------|-----------|
| M2   | 0.943(4)  |
| Fe1  | 0.048(3)  |
| Fe2  | 0.057(4)  |
| M1   | 0.952(3)  |

## 5. X-Ray Supplementary Data for Forsterite\_5

**Table S17.** Fractional atomic coordinates ( $\times 10^4$ ) and equivalent isotropic displacement parameters ( $\text{\AA}^2 \times 10^3$ ) for Forsterite\_5.  $U_{eq}$  is defined as 1/3 of the trace of the orthogonalised  $U_{ij}$  tensor.

| Atom | x          | y       | z          | $U_{eq}$ |
|------|------------|---------|------------|----------|
| Si1  | 4058.3(8)  | 7500    | 738.3(17)  | 3.3(3)   |
| M2   | 2226.4(9)  | 7500    | 5099.9(18) | 2.2(3)   |
| Fe2  | 2226.4(9)  | 7500    | 5099.9(18) | 2.2(3)   |
| M1   | 5000       | 5000    | 5000       | 2.2(3)   |
| Fe1  | 5000       | 5000    | 5000       | 2.2(3)   |
| O1   | 4086(2)    | 7500    | -2661(4)   | 4.3(5)   |
| O2   | 3370.2(13) | 5338(2) | 2225(3)    | 4.4(3)   |
| O3   | 5525(2)    | 7500    | 2207(4)    | 4.7(5)   |

**Table S18.** Anisotropic displacement parameters ( $\text{\AA}^2 \times 10^3$ ) for Forsterite\_5. The anisotropic displacement factor exponent takes the form:  $-2\pi^2[h^2a^2 + 2hka \times b \times U_{12} + \dots]$ .

| Atom | $U_{11}$ | $U_{22}$ | $U_{33}$ | $U_{23}$ | $U_{13}$ | $U_{12}$ |
|------|----------|----------|----------|----------|----------|----------|
| Si1  | 4.1(4)   | 2.5(4)   | 3.2(4)   | 0        | 0.2(3)   | 0        |
| M2   | 2.3(5)   | 1.1(5)   | 3.1(5)   | 0        | 0.2(3)   | 0        |
| Fe2  | 2.3(5)   | 1.1(5)   | 3.1(5)   | 0        | 0.2(3)   | 0        |
| M1   | 3.0(5)   | 1.0(5)   | 2.5(5)   | 0.1(3)   | 0.2(3)   | 0.6(3)   |
| Fe1  | 3.0(5)   | 1.0(5)   | 2.5(5)   | 0.1(3)   | 0.2(3)   | 0.6(3)   |

|    |         |        |         |        |         |         |
|----|---------|--------|---------|--------|---------|---------|
| O1 | 4.8(10) | 3.3(9) | 4.7(10) | 0      | 0.5(8)  | 0       |
| O2 | 5.7(7)  | 3.6(6) | 3.8(7)  | 0.2(5) | 0.3(5)  | −0.4(6) |
| O3 | 6.5(10) | 4.0(9) | 3.7(9)  | 0      | −0.4(8) | 0       |

**Table S19.** Bond lengths for Forsterite\_5.

| Atom | Atom             | Length/Å   |
|------|------------------|------------|
| Si1  | O1               | 1.616(2)   |
| Si1  | O2 <sup>4</sup>  | 1.6323(14) |
| Si1  | O2               | 1.6323(14) |
| Si1  | O3               | 1.650(2)   |
| M2   | O1 <sup>6</sup>  | 2.174(2)   |
| M2   | O2 <sup>7</sup>  | 2.0669(15) |
| M2   | O2 <sup>4</sup>  | 2.2137(16) |
| M2   | O2 <sup>8</sup>  | 2.0669(15) |
| M2   | O2               | 2.2137(16) |
| M2   | O3 <sup>5</sup>  | 2.053(2)   |
| M1   | O1 <sup>11</sup> | 2.0836(14) |
| M1   | O1 <sup>6</sup>  | 2.0836(14) |
| M1   | O2               | 2.1316(14) |
| M1   | O2 <sup>9</sup>  | 2.1316(14) |
| M1   | O3               | 2.0701(14) |
| M1   | O3 <sup>9</sup>  | 2.0701(14) |

<sup>1</sup>1/2 + X, +Y, 1/2 − Z; <sup>2</sup>1 − X, 1/2 + Y, 1 − Z; <sup>3</sup>+X, +Y, −1 + Z; <sup>4</sup>+X, 3/2 − Y, +Z; <sup>5</sup>−1/2 + X, +Y, 1/2 − Z; <sup>6</sup>+X, +Y, 1 + Z; <sup>7</sup>1/2 − X, 1/2 + Y, 1/2 + Z; <sup>8</sup>1/2 − X, 1 − Y, 1/2 + Z; <sup>9</sup>1 − X, 1 − Y, 1 − Z; <sup>10</sup>1 − X, −1/2 + Y, 1 − Z; <sup>11</sup>1 − X, 1 − Y, −Z; <sup>12</sup>1 − X, 1/2 + Y, −Z; <sup>13</sup>1/2 − X, 1 − Y, −1/2 + Z.

**Table S20.** Atomic occupancy for Forsterite\_5.

| Atom | Occupancy |
|------|-----------|
| M2   | 0.946(4)  |
| Fe1  | 0.040(4)  |
| Fe2  | 0.054(4)  |
| M1   | 0.960(4)  |
